# Supplementary material
Source: publisher figshare collection journal article supplement (https://acs.figshare.com/ndownloader/files/4495276)
Supplement: Supplementary file 1 [file 4495276]

*Supplementary Information for:*

## Photo-Targeted Nanoparticles

Tal Dvir,<sup>†,‡</sup> Matthew R. Banghart,<sup>§</sup> Brian P. Timko,<sup>‡,||</sup> Robert Langer,<sup>†</sup> and Daniel S.

Kohane<sup>\*,‡</sup>

<sup>†</sup> Department of Chemical Engineering, Massachusetts Institute of Technology, 45 Carleton Street, Cambridge, Massachusetts 02142.

<sup>‡</sup> Laboratory for Biomaterials and Drug Delivery, Department of Anesthesiology, Division of Critical Care Medicine, Children's Hospital Boston, Harvard Medical School, 300 Longwood Avenue, Boston, Massachusetts 02115.

<sup>§</sup> Department of Neurobiology, Harvard Medical School, 220 Longwood Ave, Boston, Massachusetts 02115.

<sup>||</sup> Harvard-Massachusetts Institute of Technology Division of Health Sciences and Technology, Cambridge, MA 02139

Supplementary Figures S1, S2

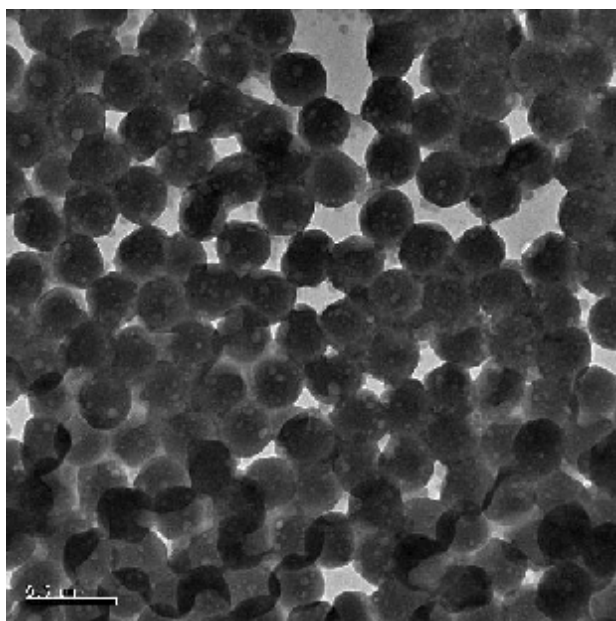

**Figure S1.** Caged Nanoparticles. Targeting peptides with or without caging groups were conjugated to the surface of carboxyl-terminated polystyrene nanoparticles ( $328 \pm 2$  nm), shown here, using 1-ethyl-3-(3-dimethylaminopropyl) carbodiimide (EDC) and sulfo-*N*-hydroxysuccinimide (NHS) activation chemistry. Bar = 0.5  $\mu$ m.

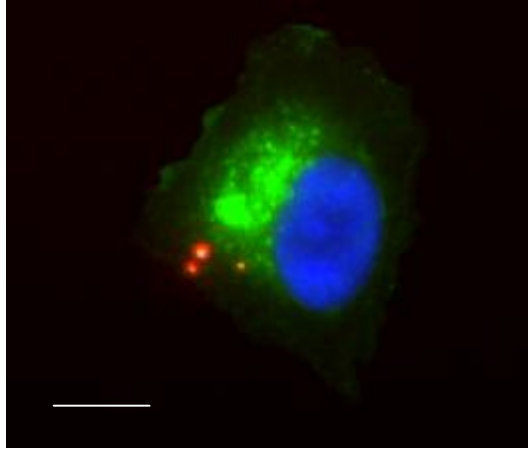

**Figure S2.** Representative image of HUVEC targeting by nanoparticles. B actin, nucleus and nanoparticles appear in green, blue and red, respectively. Bar = 10  $\mu\text{m}$ .
